# Supplementary material for: Mitochondrial spongiotic brain disease: astrocytic stress and harmful rapamycin and ketosis effect
Source: Life Sci Alliance. 2020 Jul 31;3(9):e202000797. doi: 10.26508/lsa.202000797 (PMC7409372; doi:10.26508/lsa.202000797)
Supplement: Supplementary file 1 [file LSA-2020-00797_Supplemental_Data_1.xlsx]

## Sheet: Values
Dataset EV1: Targeted metabolomics, TwKOastro preterminal
HMDB identifier	Metabolite	Ctr	Ctr	Ctr	Ctr	Ctr	Ctr	Ctr	Ctr	TwKOastro	TwKOastro	TwKOastro	TwKOastro	TwKOastro	TwKOastro	TwKOastro	TwKOastro
HMDB0001906	2-Aminoisobutyrate	4.27965	3.16494	4.71052	3.75082	4.11209	3.5472	4.19872	4.79793	4.20948	4.27262	3.59876	5.67594	6.39642	5.51562	4.60202	4.14327
HMDB0000017	4-Pyridoxate	3.29142	2.82843	5.78717	4.60462	4.0233	0.661861	4.42217	2.94269	3.16566	3.28404	1.24297	2.50469	1.96129	6.30262	2.11485	1.14785
HMDB0000763	5-Hydroxyindoleacetic acid	2.7542	1.82042	3.61572	3.97578	2.01174	2.22886	2.10472	3.48727	7.82663	2.79182	2.19557	6.11299	8.30754	13.683	3.9804	4.70536
HMDB0000060	Acetoacetate	4.06022	3.70103	4.77224	4.12467	4.41392	4.31517	3.58639	3.79044	4.14411	3.1112	3.23936	4.06836	4.57027	4.54314	3.97046	3.60206
HMDB0000201	Acetylcarnitine	5.311	4.24601	4.73856	4.55078	7.32185	5.02731	4.89256	6.81566	4.13055	2.89746	3.99874	4.81114	5.14098	5.62201	3.23477	3.3473
HMDB0000034	Adenine	4.43094	3.04729	4.58088	4.75323	4.90299	3.1358	3.4157	3.68931	4.71402	2.57709	3.06982	5.10329	5.28074	5.7305	3.94621	3.36988
HMDB0000050	Adenosine	3.8289	3.82448	4.52575	4.311	4.39579	4.59462	4.07642	3.66187	4.66722	4.17414	3.78372	4.29853	4.1052	5.09126	3.60302	4.21042
HMDB0000161	Alanine	2.94576	1.71208	2.35329	2.87041	2.83888	2.3995	1.91667	2.51744	6.56594	8.16477	7.95005	4.71544	5.81746	4.26803	7.61702	5.24595
HMDB0000462	Allantoin	4.12612	2.63088	2.1664	2.70216	4.36809	3.5701	5.00007	5.05105	3.56051	5.76068	3.85329	4.11719	4.15452	3.92691	4.48049	3.84343
HMDB0000510	Aminoadipate	2.68628	4.28379	7.00691	11.3429	5.46998	5.26957	5.25404	8.25867	3.23823	0.869315	0.99105	4.10599	3.76939	1.86609	2.98314	1.87551
HMDB0000045	AMP	5.53814	2.63315	6.26333	5.56065	4.07784	5.80346	5.78673	4.55786	3.55691	3.89131	5.00726	3.01124	2.73864	1.68451	3.79577	5.89517
HMDB0006460	Arachidyl carnitine	1.5792	1.3426	1.87767	1.58744	1.14638	1.39655	1.46943	1.21609	7.18132	16.5903	4.8714	8.79154	5.39797	5.41399	8.12515	6.81616
HMDB0000168	Asparagine	4.74107	2.5979	3.76446	3.69072	4.0732	3.80485	3.57873	3.58268	4.53137	4.20547	4.49809	4.59227	5.1689	4.40972	5.15985	4.36273
HMDB0000191	Aspartate	5.20244	4.01703	5.76918	4.85574	6.53828	5.87318	5.03103	6.35918	2.71049	1.34037	2.21349	3.20674	3.06399	3.30095	1.97005	2.72545
HMDB0000043	Betaine	5.10345	3.40366	4.82367	4.09013	10.9714	5.55149	2.70748	3.73162	4.12663	1.51713	3.61163	4.33211	4.35419	4.3716	3.02446	11.3563
HMDB0000058	cAMP	5.93588	4.70949	3.88301	6.00048	4.28954	4.94561	4.4861	4.96095	3.93565	4.40023	4.8232	5.51029	4.71592	7.00133	5.70076	5.48276
HMDB0000062	Carnitine	3.96037	3.22084	4.047	4.14909	5.75988	4.35662	4.85787	5.38822	4.44146	3.60452	4.14325	5.51688	5.05199	5.82024	4.39989	3.54408
HMDB0000518	Chenodeoxycholate	4.63745	2.38766	4.28646	5.50817	8.54616	4.22347	1.80993	4.18002	3.51288	3.2067	10.0663	3.51773	3.56083	6.20302	3.12672	3.33177
HMDB0000097	Choline	4.11413	2.43423	4.04151	3.65253	5.95015	2.99366	3.45685	5.27514	4.17713	1.97484	2.72353	6.86018	9.09649	8.97997	3.77492	4.13304
HMDB0000904	Citrulline	3.71864	3.79331	3.86911	4.52707	4.46381	4.18021	4.39749	4.19413	4.14138	3.20403	3.47991	3.65543	4.52176	4.46637	3.99814	4.7306
HMDB0000064	Creatine	3.27403	2.69136	3.4181	3.27967	4.82616	3.77706	3.51394	4.39464	4.72528	4.00877	3.8366	4.83023	4.52171	5.4558	4.6085	4.69575
HMDB0000562	Creatinine	3.56998	2.18069	3.5523	3.308	4.79183	3.54127	4.43575	5.12912	4.90402	3.88024	3.58157	6.45002	5.17166	6.70364	5.39494	4.48238
HMDB0000574	Cysteine	3.70967	3.6816	4.07602	4.02072	4.18741	4.19728	4.49283	3.9094	3.81687	3.79403	3.91854	3.94047	4.08516	4.01517	3.67595	3.61389
HMDB0000089	Cytidine	5.01514	4.17949	4.22443	3.907	5.49954	4.52448	4.57861	5.89989	3.65956	3.46449	3.99296	4.20481	4.5826	4.90477	3.4916	3.43403
HMDB0000630	Cytosine	2.56886	2.63794	3.6916	2.50349	3.11201	2.71266	3.86246	3.19203	4.43302	4.42766	4.41948	4.61028	5.51905	5.79052	6.38535	4.71632
HMDB0001548	D-Ribose-5-P	5.36614	3.6109	3.18412	2.1585	2.32489	2.33417	3.22684	3.83354	4.36986	4.10716	4.70193	7.01482	5.56025	5.19143	1.55009	5.48755
HMDB0000651	Decanoylcarnitine	3.55803	2.80332	3.47098	3.58306	3.91479	3.2829	4.0791	4.39432	4.22643	4.79238	5.45263	6.24249	3.55655	4.47125	6.39175	3.4975
HMDB0000014	Deoxycytidine	5.93473	4.68165	4.55557	5.49025	5.77193	4.74609	4.98215	4.57847	3.5537	3.53433	3.88079	2.88673	2.90433	3.04948	3.43019	3.024
HMDB0000012	Deoxyuridine	5.85163	3.40674	3.83274	3.78396	5.2097	6.78801	6.59621	6.49241	4.26357	4.10497	2.52271	3.1593	3.83172	6.45664	3.48985	4.19369
HMDB0000092	Dimethylglycine	7.56809	4.8041	9.05797	4.60731	4.45357	10.2696	4.58663	4.59293	4.06632	4.43196	3.09425	5.18807	4.29805	6.99952	4.3905	7.288
HMDB0002250	Dodecanoylcarnitine	2.51779	1.64886	2.98462	2.92335	2.43629	2.69184	3.14557	2.63165	4.74052	4.10161	6.01748	7.06835	4.98766	3.47263	7.52491	7.27302
HMDB0000121	Folate	3.99674	3.26372	4.00233	3.65217	3.8888	4.10365	3.68901	3.89894	4.69621	4.11415	4.07791	4.1955	4.42652	4.28708	3.82021	4.20498
HMDB0000112	GABA	4.28715	3.19958	4.42454	4.36286	4.24554	3.92029	3.20928	3.99923	4.40652	3.15835	4.21597	4.12143	4.49296	6.41313	3.90667	3.87362
HMDB0000127	Glucuronate	3.15416	4.78071	5.88363	5.47649	4.80162	4.34885	5.2673	4.43203	5.23499	4.30011	4.7801	4.98922	4.14919	3.61826	4.84797	5.27405
HMDB0000148	Glutamate	4.70791	3.63495	4.49429	4.86232	5.34663	4.67864	5.16895	5.74771	4.57513	2.95803	3.10944	5.107	4.95812	5.3189	3.99716	4.1497
HMDB0000641	Glutamine	4.76256	3.55551	4.57751	5.39803	5.9987	5.03071	5.49967	5.33972	4.55292	1.73782	2.30038	4.94382	4.66836	6.17607	2.40439	3.5872
HMDB0000125	Glutathione	4.10473	3.04167	4.30289	4.34818	4.02516	4.06275	4.83806	4.46771	4.36983	4.05722	3.77172	4.68204	4.10261	4.53766	4.50326	4.85557
HMDB0001051	Glyceraldehyde	4.36659	4.16836	4.02887	3.92096	5.29843	3.83646	4.09758	5.20115	5.02926	4.27072	4.10395	3.69612	5.48233	5.22395	5.83201	6.05457
HMDB0000123	Glycine	2.34947	1.26456	1.65589	1.57895	2.45694	2.66277	2.05826	2.26521	5.75774	6.91835	7.04245	8.02389	8.1728	8.29013	8.07427	6.61653
HMDB0000128	Guanidoacetate	2.68395	2.1935	2.31739	2.30139	3.15404	2.50672	2.62	2.63686	5.39589	10.7684	5.45292	5.95184	5.8173	6.5027	8.13944	5.68373
HMDB0000133	Guanosine	2.90844	1.67721	2.23664	3.09725	4.3167	2.56002	2.41947	2.59874	5.31952	6.82551	3.21036	8.66613	5.80965	12.4429	2.77376	3.61572
HMDB0000705	Hexanoylcarnitine	6.76793	4.06557	4.0609	8.05137	5.47227	4.17143	8.79462	6.18475	3.18488	3.05816	3.27693	3.25562	2.1192	2.85921	3.07106	3.71116
HMDB0000714	Hippurate	2.83672	0.369663	0.0256436	2.2487	0.504731	6.26052	2.37589	4.59114	6.94527	4.3601	3.40875	3.23337	0.544364	10.3897	7.80537	6.62635
HMDB0000157	Hypoxanthine	2.99846	2.31985	3.30183	3.06449	3.44953	2.66133	3.42886	4.11553	4.30468	3.40316	3.65901	5.96616	6.15267	6.6248	5.95499	5.16539
HMDB0000175	IMP	7.08818	1.36439	1.36893	8.19088	4.79464	2.40947	3.17313	4.76998	6.07833	3.24083	6.16477	2.1426	4.19574	1.85344	2.74437	6.28512
HMDB0000195	Inosine	3.28929	2.06722	2.93799	2.6492	3.36697	2.84053	2.76601	3.3736	5.32471	4.0037	5.27901	4.98021	6.61701	5.18743	3.99579	4.45771
HMDB0000736	Isobutyryl-L-carnitine	5.47148	3.64624	3.71231	5.00436	4.75234	4.18211	6.36084	4.73084	3.18848	6.37952	4.60491	2.42305	2.25557	2.16162	5.78101	2.8335
HMDB0000172	Isoleucine	3.18232	2.50446	3.97377	3.83523	4.45618	4.12136	3.53998	5.1873	4.27737	4.76599	3.81334	3.69268	4.30535	5.20147	4.79518	4.56538
HMDB0000688	Isovalerylcarnitine	4.23166	2.61315	2.688	3.50746	4.93855	3.46324	3.98017	3.76744	3.71506	4.30954	4.60085	4.03571	3.55277	3.97988	5.05833	3.34913
HMDB0000684	Kynurenine	3.72579	2.78684	5.32275	3.35675	3.98661	3.28527	4.73753	3.32007	4.62836	4.9822	4.12762	3.8356	4.06835	4.51801	3.73033	6.00627
HMDB0000687	Leucine	3.41568	2.74503	3.75701	3.58916	4.32735	3.65889	3.27551	3.2523	5.46097	4.53061	3.83255	4.23537	5.542	6.23168	4.86733	4.32465
HMDB0000696	Methionine	3.15797	2.75331	3.46591	3.83847	5.33331	4.26313	3.70009	4.22588	5.02114	3.38649	3.52085	5.11327	4.15018	5.95127	4.63207	4.62475
HMDB0001173	MTA	3.35872	2.80224	3.64888	3.0606	2.7994	4.83561	5.14666	5.43199	5.42622	4.1379	5.19338	4.13342	4.65178	3.67223	6.411	7.95925
HMDB0000211	Myoinositol	3.86773	3.60266	3.90979	4.48033	4.53983	4.55194	4.9282	4.56386	6.05191	3.3445	3.89183	6.05786	5.75699	4.72229	3.98915	4.85682
HMDB0000845	Neopterin	4.06881	3.26859	4.47082	4.6199	5.00659	4.86972	4.45895	4.57939	4.57649	4.20173	3.81797	5.36606	5.25259	5.84096	4.42299	4.10495
HMDB0001406	Niacinamide	3.94525	3.69053	5.05237	4.98235	6.30489	4.92417	4.38286	4.95586	4.93643	2.57904	3.2044	5.87907	5.65382	7.12047	4.75147	4.00828
HMDB0001488	Nicotinate	3.71281	2.82807	4.4463	4.43312	5.18906	4.33898	3.00081	3.42259	4.90944	2.48991	3.08394	5.21968	4.29497	7.58792	2.53339	3.61391
HMDB0000819	Normetanephrine	6.55932	3.04895	4.21819	3.27003	2.49836	2.00603	3.94095	3.81573	4.00078	0.690563	2.51583	5.06193	8.23284	3.78766	3.74154	4.66242
HMDB0000791	Octanoylcarnitine	6.17199	3.35359	3.83865	7.11189	4.54302	3.83151	7.7196	4.91975	3.39082	4.05843	4.96135	4.14181	3.04021	2.20548	3.74624	5.33842
HMDB0000214	Ornithine	3.95253	3.83205	4.03674	3.93378	3.89337	4.23079	4.2227	3.72681	4.08327	4.1226	4.12983	3.91776	4.15713	4.19385	3.83995	4.68386
HMDB0000222	Palmitoylcarnitine	2.28845	1.87463	2.81892	2.63569	1.77756	2.15095	2.33467	1.94903	5.81945	10.1174	4.62308	6.25597	4.70906	4.88447	6.84588	6.21695
HMDB0000210	Pantothenate	3.21147	2.7363	3.41956	3.17337	4.39129	3.7432	4.06745	4.56255	5.26065	5.55142	3.73741	5.37574	4.05416	6.69034	4.78163	4.31297
HMDB0000159	Phenylalanine	2.77994	2.41838	3.75385	3.66264	4.5604	4.02722	4.03205	4.19846	5.34021	4.16236	3.46566	4.3923	4.5696	7.32616	4.4426	4.94413
HMDB0000224	Phosphoethanolamine	5.75044	2.94242	4.14167	2.47682	7.16036	3.76174	3.42604	6.72251	4.91623	4.47011	3.99291	1.74122	5.57903	5.368	1.36966	2.91876
HMDB0000162	Proline	2.20302	1.67569	1.81442	2.18763	2.72932	2.30669	2.07051	2.93084	5.50362	15.3263	7.89377	4.51731	4.63793	4.68742	9.25804	5.44753
HMDB0000824	Propionylcarnitine	7.90562	5.40745	4.92002	7.04075	8.71509	5.38883	6.69169	6.39349	3.77053	3.37476	3.56703	3.11478	3.26475	3.34726	3.65749	2.69073
HMDB0000239	Pyridoxine	4.76134	3.2506	3.43911	4.79673	4.51672	4.08118	3.91236	4.50481	5.82878	2.85989	4.95826	4.4582	5.17217	3.36043	3.98358	3.78013
HMDB0000939	SAH	5.99094	2.82746	4.79683	6.2099	5.28083	3.74444	3.51051	2.32609	3.68877	4.299	3.85774	3.6723	5.28987	3.14889	2.30252	4.47981
HMDB0003334	SDMA	5.20109	4.08383	4.41057	5.65875	4.45501	4.40382	4.13603	4.63846	4.31346	3.77467	3.31852	3.94967	4.81189	3.64216	3.35843	3.53211
HMDB0000187	Serine	1.89991	1.2479	1.90716	2.13599	2.10782	1.85569	1.70959	2.14563	8.64201	7.95061	7.61025	8.78998	8.43879	8.02704	10.2504	7.9214
HMDB0000247	Sorbitol	3.07084	2.88872	2.43121	4.20562	4.16234	3.2842	3.01186	4.18861	5.33569	7.2345	5.86288	3.52921	3.96017	4.27537	4.37901	3.17178
HMDB0001257	Spermidine	2.91957	3.05662	3.24733	3.01447	4.01079	3.07885	3.49331	3.21581	3.85369	3.09971	3.31832	2.98015	5.352	3.82653	2.76758	21.6788
HMDB0000848	Stearoylcarnitine	2.01617	2.17162	2.63436	2.02726	1.40109	1.80935	1.92731	1.65864	7.16484	13.8561	4.91209	7.31828	5.30835	5.51363	8.29944	6.70775
HMDB0000254	Succinate	3.76647	2.8745	3.5305	4.29398	4.07872	3.67589	4.17832	3.76057	4.67175	4.74967	4.00382	4.65682	4.45099	4.10598	4.93572	4.64392
HMDB0000258	Sucrose	2.87254	2.89551	3.49346	3.44703	4.94484	4.87533	2.65591	3.19976	4.64069	3.74683	3.48619	5.62583	4.46995	7.09396	3.77168	4.72058
HMDB0000251	Taurine	4.06005	2.65867	4.0351	4.9182	6.05054	5.02162	3.96268	4.69385	5.18883	3.48585	3.73797	6.373	5.37228	7.19549	4.02274	4.37827
HMDB0000951	Taurochenodesoxycholate	3.4058	2.65838	4.46594	4.7109	5.56537	3.8762	3.26801	3.73269	4.98839	3.58891	2.94235	6.78313	4.49417	10.1057	3.61905	4.38897
HMDB0000036	Taurocholate	5.63753	4.29264	4.46628	3.90938	5.56561	4.53941	4.18846	5.96385	3.99755	3.62678	4.07427	4.25028	4.94781	4.72696	3.3884	3.3641
HMDB0005066	Tetradecanoylcarnitine	2.8258	1.79576	4.42084	3.97998	2.51026	3.1883	3.12132	2.83556	4.40845	7.26153	4.746	5.63542	3.91104	3.97693	5.48754	5.79381
HMDB0000167	Threonine	3.38775	2.81407	3.89026	3.70706	4.39578	3.831	4.02493	3.44158	5.74671	4.39338	3.94347	5.73734	5.01434	5.64651	5.03066	5.25915
HMDB0000925	Trimethylamine N-oxide	3.84386	2.71413	4.35832	5.26703	7.35494	4.19411	4.11248	4.92124	4.97639	3.56163	3.22615	7.11107	5.28263	10.5773	3.64425	4.12916
HMDB0000929	Tryptophan	3.0554	2.60833	3.95877	3.90676	4.39965	3.86811	3.76922	4.01406	5.51722	3.15228	3.54537	4.84731	4.62026	6.5251	4.30888	5.08235
HMDB0000158	Tyrosine	3.29735	2.68295	3.17186	4.01949	5.30963	4.90152	4.48825	4.33181	4.25913	2.91006	2.92112	4.40853	4.05244	7.15506	4.24395	6.18197
HMDB0000300	Uracil	2.67143	1.48769	1.81659	1.98822	2.52977	1.34509	1.62451	1.86598	6.22775	3.87319	4.21291	5.75456	5.07773	5.04507	6.80034	4.80341
HMDB0000883	Valine	3.32489	2.43378	3.42587	3.85762	4.25001	3.70083	3.44463	4.08633	4.29559	4.19697	3.61879	4.14439	4.52297	5.27855	4.65611	4.22787
HMDB0000292	Xanthine	4.16157	2.79617	3.28533	3.68165	4.79134	3.28062	2.74035	3.82007	4.89503	3.19947	3.92011	5.63028	6.04423	7.94294	3.96642	3.94029
HMDB0000299	Xanthosine	3.5384	1.49042	3.70476	2.89089	5.03522	2.77242	3.49516	2.6725	2.87422	3.16586	3.93562	3.63004	3.28239	5.3029	4.09518	4.01212

## Sheet: FC
HMDB identifier	Metabolite	Ctr	Ctr	Ctr	Ctr	Ctr	Ctr	Ctr	Ctr	TwKOastro	TwKOastro	TwKOastro	TwKOastro	TwKOastro	TwKOastro	TwKOastro	TwKOastro
HMDB0001906	2-Aminoisobutyrate	1.05145	0.777582	1.15731	0.921525	1.01028	0.871497	1.03157	1.17878	1.03421	1.04972	0.884166	1.3945	1.57151	1.35511	1.13065	1.01794
HMDB0000017	4-Pyridoxate	0.921912	0.792232	1.62096	1.28973	1.12691	0.185385	1.23863	0.824234	0.886688	0.919846	0.348151	0.701553	0.54935	1.76534	0.592362	0.321509
HMDB0000763	5-Hydroxyindoleacetic acid	1.00159	0.662009	1.31488	1.44582	0.731584	0.810542	0.765399	1.26817	2.84621	1.01527	0.798438	2.22304	3.0211	4.97593	1.4475	1.71114
HMDB0000060	Acetoacetate	0.991384	0.903679	1.16524	1.00712	1.07775	1.05364	0.875688	0.92551	1.01187	0.759662	0.790955	0.99337	1.11592	1.1093	0.969466	0.879514
HMDB0000201	Acetylcarnitine	0.99031	0.791728	0.88357	0.848557	1.36526	0.937412	0.912286	1.27088	0.7702	0.540272	0.745621	0.897104	0.958608	1.0483	0.603168	0.624151
HMDB0000034	Adenine	1.10926	0.762869	1.14679	1.18994	1.22743	0.785026	0.855098	0.923594	1.18012	0.645156	0.768507	1.27757	1.322	1.43459	0.987906	0.843626
HMDB0000050	Adenosine	0.922103	0.921039	1.08992	1.03821	1.05862	1.10651	0.981714	0.881879	1.12399	1.00525	0.911223	1.0352	0.988644	1.22611	0.867704	1.01398
HMDB0000161	Alanine	1.20518	0.700452	0.962786	1.17435	1.16145	0.981689	0.784153	1.02994	2.68628	3.3404	3.25255	1.9292	2.38005	1.74615	3.1163	2.14624
HMDB0000462	Allantoin	1.11461	0.710691	0.585221	0.729948	1.17997	0.964407	1.35069	1.36446	0.961817	1.55616	1.04091	1.11219	1.12228	1.06079	1.21034	1.03824
HMDB0000510	Aminoadipate	0.433514	0.691322	1.13078	1.83053	0.88275	0.850408	0.847902	1.33279	0.522589	0.140291	0.159937	0.662629	0.608308	0.301152	0.481422	0.302671
HMDB0000045	AMP	1.10154	0.523734	1.24578	1.10601	0.811084	1.15431	1.15098	0.906559	0.70747	0.773983	0.995945	0.598937	0.544717	0.335049	0.754979	1.17255
HMDB0006460	Arachidyl carnitine	1.08766	0.924706	1.29323	1.09334	0.789562	0.961863	1.01206	0.837576	4.9461	11.4265	3.35515	6.05512	3.71783	3.72885	5.59615	4.69459
HMDB0000168	Asparagine	1.27134	0.696637	1.00946	0.98968	1.09225	1.02029	0.95965	0.96071	1.21511	1.12771	1.20618	1.23143	1.38606	1.18248	1.38363	1.16988
HMDB0000191	Aspartate	0.953568	0.736293	1.05745	0.890022	1.19842	1.07651	0.922151	1.16559	0.496812	0.24568	0.405716	0.587772	0.561607	0.60504	0.361095	0.499554
HMDB0000043	Betaine	1.01101	0.674276	0.955585	0.810269	2.17348	1.09977	0.536362	0.739246	0.8175	0.300549	0.715476	0.858206	0.862581	0.866029	0.599157	2.24973
HMDB0000058	cAMP	1.21106	0.960849	0.792228	1.22424	0.875169	1.00902	0.915272	1.01215	0.802968	0.897754	0.984048	1.12423	0.962162	1.42844	1.16309	1.11861
HMDB0000062	Carnitine	0.886487	0.720952	0.905879	0.928731	1.28929	0.975183	1.08738	1.2061	0.994174	0.806833	0.927423	1.23489	1.13083	1.3028	0.984869	0.793304
HMDB0000518	Chenodeoxycholate	1.04273	0.536864	0.96381	1.23851	1.9216	0.949646	0.406962	0.939876	0.789871	0.721026	2.2634	0.790961	0.800651	1.39475	0.703042	0.749148
HMDB0000097	Choline	1.03117	0.610118	1.01297	0.915473	1.49135	0.750333	0.866427	1.32217	1.04696	0.494975	0.682627	1.71944	2.27995	2.25074	0.946148	1.03591
HMDB0000904	Citrulline	0.897579	0.915601	0.933896	1.09271	1.07744	1.00899	1.06143	1.01235	0.999615	0.773364	0.839955	0.882321	1.09143	1.07806	0.965042	1.14184
HMDB0000064	Creatine	0.897763	0.737993	0.937269	0.899311	1.32337	1.0357	0.96355	1.20505	1.29571	1.09924	1.05203	1.32448	1.23989	1.49602	1.26369	1.28761
HMDB0000562	Creatinine	0.936115	0.571817	0.931477	0.867418	1.2565	0.928586	1.16313	1.34495	1.28592	1.01747	0.939153	1.69131	1.3561	1.75782	1.41465	1.17536
HMDB0000574	Cysteine	0.919519	0.912559	1.01032	0.996618	1.03794	1.04038	1.11364	0.969024	0.94609	0.940428	0.971291	0.976725	1.01259	0.995241	0.911158	0.895775
HMDB0000089	Cytidine	1.0606	0.88388	0.893384	0.826254	1.16304	0.956839	0.968286	1.24771	0.773924	0.732671	0.844432	0.889234	0.96913	1.03726	0.738405	0.72623
HMDB0000630	Cytosine	0.846374	0.869136	1.21629	0.824839	1.02533	0.893752	1.27258	1.05169	1.46057	1.4588	1.45611	1.51897	1.81839	1.90783	2.10381	1.55391
HMDB0001548	D-Ribose-5-P	1.64864	1.10938	0.978257	0.663158	0.714277	0.717127	0.991382	1.17778	1.34255	1.26184	1.44458	2.15517	1.70828	1.59496	0.476233	1.68594
HMDB0000651	Decanoylcarnitine	0.978607	0.77103	0.954664	0.98549	1.07673	0.902934	1.12192	1.20862	1.16245	1.31811	1.4997	1.71695	0.9782	1.22978	1.758	0.961958
HMDB0000014	Deoxycytidine	1.16536	0.919304	0.894547	1.07808	1.13339	0.931957	0.978312	0.899042	0.697815	0.694013	0.762045	0.566846	0.570303	0.598806	0.673562	0.593802
HMDB0000012	Deoxyuridine	1.11562	0.6495	0.730718	0.721418	0.993237	1.29414	1.25758	1.23779	0.812855	0.782618	0.480959	0.602325	0.730524	1.23097	0.665345	0.799533
HMDB0000092	Dimethylglycine	1.21234	0.769575	1.45101	0.738051	0.713424	1.64511	0.734739	0.735749	0.651389	0.709963	0.495673	0.831085	0.688511	1.12126	0.703321	1.16747
HMDB0002250	Dodecanoylcarnitine	0.960073	0.628737	1.13808	1.11472	0.928996	1.02644	1.19946	1.00349	1.80764	1.56401	2.29456	2.69528	1.90187	1.32417	2.86937	2.77332
HMDB0000121	Folate	1.04849	0.856187	1.04995	0.958091	1.02017	1.07653	0.967757	1.02283	1.23198	1.07928	1.06978	1.10063	1.16123	1.12465	1.00217	1.10311
HMDB0000112	GABA	1.08369	0.80878	1.11842	1.10283	1.07317	0.990959	0.811232	1.01091	1.11387	0.798357	1.0657	1.0418	1.13572	1.62109	0.987515	0.979162
HMDB0000127	Glucuronate	0.661513	1.00265	1.23396	1.14857	1.00703	0.912072	1.1047	0.929517	1.09792	0.901849	1.00252	1.04638	0.870197	0.758847	1.01675	1.10611
HMDB0000148	Glutamate	0.974688	0.752551	0.930462	1.00665	1.10692	0.968627	1.07014	1.18996	0.947198	0.612406	0.643753	1.05731	1.02649	1.10118	0.827538	0.859119
HMDB0000641	Glutamine	0.94866	0.708227	0.911799	1.07524	1.19489	1.00207	1.09549	1.06363	0.906902	0.346159	0.458215	0.984765	0.929896	1.23022	0.478934	0.714539
HMDB0000125	Glutathione	0.989356	0.733128	1.03712	1.04803	0.970178	0.979236	1.16611	1.07684	1.05325	0.977905	0.909091	1.1285	0.988844	1.0937	1.08541	1.17033
HMDB0001051	Glyceraldehyde	1.00041	0.954994	0.923036	0.898313	1.2139	0.878955	0.938778	1.19161	1.15223	0.978446	0.940238	0.846802	1.25603	1.19684	1.33615	1.38714
HMDB0000123	Glycine	1.15368	0.620945	0.813105	0.775321	1.20645	1.30752	1.01068	1.1123	2.82727	3.39717	3.45811	3.94003	4.01315	4.07076	3.96477	3.24896
HMDB0000128	Guanidoacetate	1.05182	0.859613	0.908163	0.901892	1.23604	0.982359	1.02675	1.03336	2.1146	4.22003	2.13695	2.33247	2.27975	2.54835	3.18977	2.2274
HMDB0000133	Guanosine	1.06661	0.615082	0.820242	1.13585	1.58306	0.938835	0.88729	0.953034	1.95082	2.50311	1.17733	3.17812	2.13057	4.56317	1.01722	1.32599
HMDB0000705	Hexanoylcarnitine	1.13821	0.683737	0.682952	1.35406	0.920311	0.70154	1.47905	1.04013	0.535624	0.514313	0.551105	0.547521	0.356401	0.480855	0.516482	0.624133
HMDB0000714	Hippurate	1.18117	0.153922	0.0106776	0.936326	0.210162	2.60679	0.989282	1.91168	2.8919	1.81548	1.41935	1.34632	0.226665	4.32612	3.25004	2.75911
HMDB0000157	Hypoxanthine	0.946636	0.732395	1.04241	0.967483	1.08904	0.840202	1.08252	1.29931	1.35902	1.0744	1.15518	1.88356	1.94244	2.0915	1.88004	1.63075
HMDB0000175	IMP	1.71008	0.329168	0.330264	1.97611	1.15674	0.581303	0.765541	1.15079	1.46644	0.781875	1.4873	0.516919	1.01225	0.447156	0.662099	1.51633
HMDB0000195	Inosine	1.12981	0.710055	1.00915	0.909956	1.1565	0.975674	0.950079	1.15878	1.82895	1.3752	1.81325	1.71062	2.27283	1.78179	1.37249	1.53115
HMDB0000736	Isobutyryl-L-carnitine	1.15613	0.770457	0.784419	1.05743	1.00418	0.883688	1.34406	0.999635	0.673732	1.348	0.973027	0.511995	0.476607	0.456754	1.22154	0.598723
HMDB0000172	Isoleucine	0.826561	0.650497	1.03213	0.996144	1.15743	1.07046	0.919458	1.34732	1.11098	1.23789	0.990458	0.959118	1.11825	1.35101	1.24548	1.18579
HMDB0000688	Isovalerylcarnitine	1.15977	0.716186	0.736698	0.961288	1.35351	0.949167	1.09084	1.03254	1.01818	1.18111	1.26095	1.10607	0.973707	1.09076	1.38633	0.917895
HMDB0000684	Kynurenine	0.976564	0.730457	1.39514	0.879837	1.04493	0.8611	1.24175	0.870221	1.21314	1.30588	1.08189	1.00535	1.06635	1.18421	0.977756	1.5743
HMDB0000687	Leucine	0.97518	0.783708	1.07263	1.02471	1.23546	1.04462	0.93516	0.928536	1.55911	1.29349	1.0942	1.2092	1.58224	1.77915	1.38963	1.23469
HMDB0000696	Methionine	0.821904	0.716586	0.902051	0.999014	1.38807	1.10954	0.962999	1.09984	1.30682	0.88138	0.91635	1.3308	1.08014	1.5489	1.20556	1.20365
HMDB0001173	MTA	0.86442	0.721203	0.939098	0.787697	0.720472	1.24452	1.32458	1.39801	1.39653	1.06496	1.3366	1.0638	1.19721	0.945108	1.64998	2.04844
HMDB0000211	Myoinositol	0.898314	0.83675	0.908083	1.0406	1.05442	1.05723	1.14462	1.06	1.40561	0.776789	0.903911	1.40699	1.33711	1.09679	0.926515	1.12804
HMDB0000845	Neopterin	0.920994	0.739861	1.01199	1.04574	1.13326	1.10228	1.0093	1.03657	1.03591	0.95108	0.864214	1.21463	1.18895	1.32213	1.00116	0.929174
HMDB0001406	Niacinamide	0.825404	0.772111	1.05703	1.04238	1.31907	1.03021	0.916958	1.03684	1.03277	0.539571	0.670406	1.22999	1.18286	1.48971	0.994077	0.838589
HMDB0001488	Nicotinate	0.94679	0.721176	1.13384	1.13048	1.32324	1.10647	0.765227	0.872783	1.25194	0.634943	0.786424	1.33105	1.09524	1.93497	0.64603	0.92157
HMDB0000819	Normetanephrine	1.78743	0.830846	1.14947	0.89109	0.680809	0.546647	1.07392	1.03979	1.09022	0.18818	0.685569	1.37939	2.24347	1.03215	1.01958	1.27052
HMDB0000791	Octanoylcarnitine	1.19007	0.646632	0.740158	1.3713	0.875974	0.738783	1.48847	0.948614	0.653811	0.782537	0.956636	0.798614	0.586207	0.425255	0.722341	1.02934
HMDB0000214	Ornithine	0.993449	0.963166	1.01462	0.988735	0.978579	1.06339	1.06135	0.936714	1.02631	1.03619	1.03801	0.98471	1.04487	1.0541	0.965153	1.17727
HMDB0000222	Palmitoylcarnitine	1.02679	0.841116	1.26481	1.18259	0.797564	0.965097	1.04753	0.874501	2.6111	4.53951	2.0743	2.80696	2.11288	2.19159	3.07164	2.78945
HMDB0000210	Pantothenate	0.876696	0.74698	0.933502	0.866297	1.19877	1.02185	1.11037	1.24553	1.4361	1.51548	1.02027	1.46752	1.10674	1.82639	1.30533	1.17739
HMDB0000159	Phenylalanine	0.7556	0.657327	1.02031	0.995522	1.23954	1.09462	1.09593	1.14116	1.45149	1.13135	0.941982	1.19385	1.24204	1.99128	1.20752	1.34384
HMDB0000224	Phosphoethanolamine	1.26446	0.647006	0.910707	0.544625	1.57448	0.827166	0.753348	1.47821	1.08102	0.982927	0.877997	0.382876	1.22677	1.18036	0.301174	0.641802
HMDB0000162	Proline	0.983595	0.748154	0.810094	0.976723	1.21858	1.02988	0.924433	1.30855	2.45723	6.84279	3.52437	2.01687	2.07072	2.09282	4.13349	2.43219
HMDB0000824	Propionylcarnitine	1.20552	0.824575	0.750246	1.07363	1.32895	0.821735	1.02041	0.974935	0.574963	0.514612	0.543932	0.474968	0.497838	0.51042	0.557725	0.410305
HMDB0000239	Pyridoxine	1.14514	0.781797	0.827137	1.15365	1.08631	0.981558	0.940956	1.08345	1.40187	0.687828	1.1925	1.07223	1.24395	0.808211	0.958085	0.909153
HMDB0000939	SAH	1.38171	0.652107	1.10631	1.43221	1.21794	0.863596	0.809643	0.536475	0.850755	0.991496	0.889726	0.846957	1.22002	0.726242	0.531038	1.0332
HMDB0003334	SDMA	1.12494	0.883288	0.953958	1.22393	0.96357	0.952498	0.894577	1.00325	0.932953	0.816419	0.717759	0.85427	1.04076	0.787758	0.726392	0.763957
HMDB0000187	Serine	1.01263	0.665115	1.0165	1.13846	1.12344	0.989061	0.911195	1.1436	4.6061	4.23759	4.05618	4.68496	4.49778	4.27832	5.46336	4.22202
HMDB0000247	Sorbitol	0.901749	0.848269	0.713923	1.23498	1.22227	0.964404	0.884431	1.22998	1.56682	2.1244	1.72163	1.03635	1.1629	1.25546	1.28589	0.931391
HMDB0001257	Spermidine	0.897061	0.939171	0.99777	0.926221	1.23235	0.946001	1.07335	0.988083	1.18408	0.952412	1.01958	0.915677	1.64444	1.17573	0.850363	6.661
HMDB0000848	Stearoylcarnitine	1.03091	1.11039	1.347	1.03658	0.716404	0.925153	0.985471	0.848094	3.66352	7.08491	2.51165	3.74198	2.71426	2.81923	4.24366	3.4298
HMDB0000254	Succinate	0.999097	0.762493	0.936504	1.13903	1.08193	0.975071	1.10835	0.997534	1.23923	1.2599	1.06206	1.23527	1.18068	1.08916	1.30925	1.23185
HMDB0000258	Sucrose	0.809612	0.816085	0.984614	0.971529	1.39368	1.37409	0.748556	0.901836	1.30796	1.05603	0.982565	1.58561	1.25983	1.9994	1.06303	1.33047
HMDB0000251	Taurine	0.917508	0.600817	0.911869	1.11143	1.36733	1.13481	0.895503	1.06074	1.17259	0.787747	0.844722	1.4402	1.21405	1.62607	0.909076	0.989419
HMDB0000951	Taurochenodesoxycholate	0.85996	0.671238	1.12765	1.1895	1.40525	0.978738	0.825171	0.9425	1.25956	0.906196	0.742941	1.71273	1.13477	2.55169	0.913807	1.10821
HMDB0000036	Taurocholate	1.16952	0.890517	0.926538	0.811009	1.1546	0.94171	0.868903	1.23721	0.829299	0.752382	0.845214	0.881729	1.02643	0.980618	0.702931	0.69789
HMDB0005066	Tetradecanoylcarnitine	0.916061	0.582146	1.43314	1.29022	0.813769	1.03358	1.01186	0.919227	1.42912	2.35403	1.53855	1.82688	1.26787	1.28923	1.77894	1.87822
HMDB0000167	Threonine	0.918948	0.763333	1.05526	1.00556	1.19238	1.03918	1.09179	0.93355	1.55883	1.19173	1.06969	1.55629	1.36017	1.53165	1.3646	1.42658
HMDB0000925	Trimethylamine N-oxide	0.836391	0.590572	0.948335	1.14606	1.60037	0.912604	0.894842	1.07082	1.08282	0.774981	0.701983	1.54731	1.14946	2.30153	0.792958	0.89847
HMDB0000929	Tryptophan	0.826334	0.705423	1.07065	1.05658	1.18989	1.04613	1.01939	1.0856	1.49214	0.852536	0.958846	1.31096	1.24955	1.76472	1.16534	1.37452
HMDB0000158	Tyrosine	0.819145	0.666512	0.787971	0.998543	1.31905	1.21766	1.11499	1.07613	1.05808	0.722933	0.725681	1.09519	1.00673	1.7775	1.05431	1.53576
HMDB0000300	Uracil	1.39416	0.776391	0.948039	1.0376	1.32023	0.701971	0.847797	0.973812	3.25012	2.02133	2.19862	3.00317	2.64995	2.63291	3.54894	2.50679
HMDB0000883	Valine	0.932519	0.682592	0.96084	1.08193	1.19198	1.03796	0.966101	1.14608	1.20477	1.17711	1.01495	1.16236	1.26854	1.48045	1.30588	1.18577
HMDB0000292	Xanthine	1.16582	0.78332	0.920355	1.03138	1.34225	0.919034	0.767682	1.07016	1.3713	0.8963	1.09818	1.57727	1.69323	2.22514	1.11115	1.10384
HMDB0000299	Xanthosine	1.10576	0.465761	1.15775	0.903411	1.57352	0.866389	1.09225	0.835164	0.8982	0.98934	1.22989	1.1344	1.02576	1.65717	1.27976	1.2538

## Sheet: Statistical analysis
HMDB identifier	Metabolite	Log2fc (TwKOastro_vs_Ctr)	pvalue (TwKOastro_vs_Ctr)	p.adjusted (TwKOastro_vs_Ctr)	qvalue (TwKOastro_vs_Ctr)
HMDB0000187	Serine	2.17178	5.09e-12	4.4283e-10	1.41324e-10
HMDB0000123	Glycine	1.85401	8.02e-10	3.4887e-08	1.11338e-08
HMDB0000300	Uracil	1.44704	6.38e-07	1.8502e-05	5.90469e-06
HMDB0000191	Aspartate	-1.08801	2.6e-06	4.524e-05	1.44378e-05
HMDB0000014	Deoxycytidine	-0.633414	2.24e-06	4.524e-05	1.44378e-05
HMDB0000161	Alanine	1.36437	7.29e-06	0.000105705	3.37345e-05
HMDB0000824	Propionylcarnitine	-0.969748	1.05e-05	0.0001305	4.16475e-05
HMDB0000630	Cytosine	0.731009	2.5e-05	0.00022533	7.19114e-05
HMDB0000128	Guanidoacetate	1.3957	2.17e-05	0.00022533	7.19114e-05
HMDB0000222	Palmitoylcarnitine	1.47232	2.59e-05	0.00022533	7.19114e-05
HMDB0000195	Inosine	0.774659	2.86e-05	0.0002262	7.21891e-05
HMDB0002250	Dodecanoylcarnitine	1.10687	0.000110473	0.000739319	0.000235945
HMDB0000848	Stearoylcarnitine	1.91691	0.000106057	0.000739319	0.000235945
HMDB0000167	Threonine	0.467219	0.000223365	0.00138805	0.000442981
HMDB0006460	Arachidyl carnitine	2.44362	0.000270648	0.00156976	0.00050097
HMDB0000705	Hexanoylcarnitine	-0.955105	0.000744299	0.00404713	0.00129159
HMDB0000157	Hypoxanthine	0.702314	0.000901129	0.00412622	0.00131684
HMDB0000687	Leucine	0.4779	0.000897863	0.00412622	0.00131684
HMDB0005066	Tetradecanoylcarnitine	0.740155	0.000888223	0.00412622	0.00131684
HMDB0000254	Succinate	0.264147	0.00165249	0.00718834	0.00229408
HMDB0000162	Proline	1.67641	0.00229284	0.00949893	0.00303147
HMDB0000510	Aminoadipate	-1.33143	0.00291283	0.0110181	0.0035163
HMDB0000168	Asparagine	0.307792	0.00282136	0.0110181	0.0035163
HMDB0000210	Pantothenate	0.440319	0.00619449	0.022455	0.00716625
HMDB0000064	Creatine	0.330366	0.00709282	0.0237337	0.00757432
HMDB0000121	Folate	0.149396	0.00707919	0.0237337	0.00757432
HMDB0000883	Valine	0.292757	0.00827714	0.0266708	0.00851166
HMDB0003334	SDMA	-0.268759	0.00982517	0.0305282	0.00974271
HMDB0000133	Guanosine	1.15756	0.0129163	0.0387489	0.0123663
HMDB0000651	Decanoylcarnitine	0.409409	0.0151536	0.0439455	0.0140247
HMDB0000763	5-Hydroxyindoleacetic acid	1.17302	0.0232599	0.0652779	0.0208327
HMDB0000562	Creatinine	0.411127	0.0286734	0.0749945	0.0239336
HMDB0000089	Cytidine	-0.25341	0.0293082	0.0749945	0.0239336
HMDB0000247	Sorbitol	0.470517	0.027843	0.0749945	0.0239336
HMDB0000159	Phenylalanine	0.392776	0.0310389	0.0771539	0.0246228
HMDB0000201	Acetylcarnitine	-0.370661	0.0353404	0.0834911	0.0266452
HMDB0000929	Tryptophan	0.346049	0.0355077	0.0834911	0.0266452
HMDB0000292	Xanthine	0.469419	0.0379777	0.086949	0.0277487
HMDB0000714	Hippurate	1.17273	0.0417256	0.0907532	0.0289628
HMDB0000036	Taurocholate	-0.252291	0.0413379	0.0907532	0.0289628
HMDB0001548	D-Ribose-5-P	0.544677	0.042852	0.0909299	0.0290192
HMDB0000258	Sucrose	0.403935	0.0463713	0.0960549	0.0306548
HMDB0000045	AMP	-0.443293	0.0529131	0.107057	0.0341659
HMDB0001173	MTA	0.419893	0.0562862	0.111293	0.0355179
HMDB0000641	Glutamine	-0.403153	0.0632321	0.122249	0.0390142
HMDB0000791	Octanoylcarnitine	-0.425961	0.0708199	0.133942	0.042746
HMDB0000012	Deoxyuridine	-0.389979	0.0728233	0.134801	0.04302
HMDB0001906	2-Aminoisobutyrate	0.238454	0.0824611	0.149461	0.0476987
HMDB0000696	Methionine	0.243913	0.106938	0.18987	0.0605946
HMDB0000172	Isoleucine	0.201473	0.110425	0.19214	0.0613191
HMDB0000684	Kynurenine	0.234022	0.112765	0.192364	0.0613908
HMDB0001051	Glyceraldehyde	0.184894	0.122462	0.204889	0.0653879
HMDB0000574	Cysteine	-0.0646726	0.134155	0.220216	0.0702795
HMDB0000736	Isobutyryl-L-carnitine	-0.35375	0.147444	0.237548	0.0758108
HMDB0000214	Ornithine	0.057731	0.157783	0.249584	0.0796516
HMDB0000148	Glutamate	-0.17727	0.169578	0.263451	0.0840774
HMDB0000092	Dimethylglycine	-0.329006	0.216874	0.314467	0.100358
HMDB0000211	Myoinositol	0.166998	0.211256	0.314467	0.100358
HMDB0000951	Taurochenodesoxycholate	0.368757	0.213404	0.314467	0.100358
HMDB0000299	Xanthosine	0.243107	0.211503	0.314467	0.100358
HMDB0000688	Isovalerylcarnitine	0.15947	0.22829	0.325594	0.103909
HMDB0000097	Choline	0.386363	0.2648	0.371575	0.118584
HMDB0001257	Spermidine	0.848326	0.272666	0.376538	0.120168
HMDB0000462	Allantoin	0.186299	0.287058	0.39022	0.124534
HMDB0000017	4-Pyridoxate	-0.394791	0.300482	0.402183	0.128352
HMDB0000112	GABA	0.128162	0.344425	0.454014	0.144893
HMDB0000125	Glutathione	0.0715978	0.360831	0.468542	0.14953
HMDB0000251	Taurine	0.167338	0.36637	0.468738	0.149592
HMDB0000845	Neopterin	0.0886931	0.390181	0.484939	0.154763
HMDB0000224	Phosphoethanolamine	-0.261247	0.388915	0.484939	0.154763
HMDB0000939	SAH	-0.174329	0.426325	0.522398	0.166717
HMDB0000158	Tyrosine	0.1661	0.436063	0.526909	0.168157
HMDB0000060	Acetoacetate	-0.0683065	0.442848	0.527778	0.168434
HMDB0000925	Trimethylamine N-oxide	0.209377	0.482351	0.567088	0.18098
HMDB0000058	cAMP	0.0842871	0.500699	0.580811	0.185359
HMDB0000904	Citrulline	-0.0417837	0.602441	0.689637	0.220089
HMDB0000034	Adenine	0.0805687	0.644422	0.728114	0.232369
HMDB0000819	Normetanephrine	0.155275	0.652931	0.728269	0.232419
HMDB0001488	Nicotinate	0.104701	0.665227	0.732592	0.233798
HMDB0000050	Adenosine	0.0307094	0.67429	0.73329	0.234021
HMDB0000043	Betaine	-0.138198	0.741594	0.781639	0.249451
HMDB0000127	Glucuronate	-0.036421	0.745701	0.781639	0.249451
HMDB0000239	Pyridoxine	0.0485571	0.73225	0.781639	0.249451
HMDB0000062	Carnitine	0.0312416	0.817403	0.846596	0.270181
HMDB0000518	Chenodeoxycholate	0.0378826	0.91774	0.939334	0.299777
HMDB0000175	IMP	-0.0199064	0.960101	0.971265	0.309968
HMDB0001406	Niacinamide	-0.00397883	0.982706	0.982706	0.313619
