# Supplementary material for: Mitochondrial spongiotic brain disease: astrocytic stress and harmful rapamycin and ketosis effect
Source: Life Sci Alliance. 2020 Jul 31;3(9):e202000797. doi: 10.26508/lsa.202000797 (PMC7409372; doi:10.26508/lsa.202000797)
Supplement: Supplementary file 4 [file LSA-2020-00797_TableS2.xlsx]

## Sheet: Sheet1
Table S2. Primer sequences used in the study
Mouse gene symbol	Protein product		5'-3'
Hmbs	Porphobilinogen deaminase	Fwd	AGAAAAGTGCCGTGGGAACC
		Rev	CCAGGACGATGGCACTGAAT
Atf3	cAMP-dependent transcription factor ATF-3	Fwd	CCCCTGGAGATGTCAGTCAC
		Rev	CTGACTCTTTCTGCAGGCACTC
Atf4	cAMP-dependent transcription factor ATF-4	Fwd	CCTATAAAGGCTTGCGGCCA
		Rev	TGCTGCTGGATTTCGTGAAGAG
Atf5	cAMP-dependent transcription factor ATF-5	Fwd	GAGGGAGGTCTCGTGTACGTCTG
		Rev	GCTTTCTCAGTTGCACTGAAGGGG
Phgdh	D-3-phosphoglycerate dehydrogenase	Fwd	GACCCCATCATCTCTCCTGA
		Rev	GCACACCTTTCTTGCACTGA
Psat1	Phosphoserine aminotransferase	Fwd	AGCTGTGCGGAATGAGATGC
		Rev	ACTCATTTCGAGCACACTGATG
Mthfd2	Bifunctional methylenetetrahydrofolate dehydrogenase/cyclohydrolase, mitochondrial	Fwd	AGGTCCCAAGCCTTTGAGTT
		Rev	GTAAGGGAGTGCCGTTGAAA
Gdf15	Growth/differentiation factor 15	Fwd	CAACCAGAGCCGAGAGGAC
		Rev	TGCACGCGGTAGGCTTC
mtDNA copy number analysis			5'-3'
mtDNA		Fwd	AGGAGCCTGTTCTATAATCGATAAA
		Rev	GATGGCGGTATATAGGCCGAA
nuclear DNA (RBM15)		Fwd	GGACAGTTTTCTTGGGCAAC
		Rev	AGTTTGGCCCTGTGAGACAT
