# Supplementary material for: Mitochondrial spongiotic brain disease: astrocytic stress and harmful rapamycin and ketosis effect
Source: Life Sci Alliance. 2020 Jul 31;3(9):e202000797. doi: 10.26508/lsa.202000797 (PMC7409372; doi:10.26508/lsa.202000797)
Supplement: Supplementary file 6 [file LSA-2020-00797_TableS4.xlsx]

## Sheet: sheet1
Statistical analysis for Fig 1 and Fig S1. Statistical analysis of metabolomics can be found in Supplemental Data 1 and 2.
Statistical analysis, Fig 1B
	TwKOastro vs Ctr, preterminal			TwKOneuro vs Ctr, preterminal
	Mean of FC	Significant?	p value	Mean of FC	Significant?	p value
ATF3	4.295	Yes	0.000126	23.91	No	0.136863
ATF4	1.287	No	0.196625	1.08	No	0.81576
ATF5	4.373	Yes	3.1e-05	0.7444	No	0.428821
PHGDH	1.61	Yes	0.02068	0.6987	No	0.382453
PSAT1	2.569	Yes	0.000792	1.276	No	0.396214
MTHFD2	2.125	Yes	0.003691	1.337	No	0.432587
Statistical analysis, Fig 1C
	TwKOastro vs Ctr, preterminal			TwKOneuro vs Ctr, preterminal
	Mean of FC	Significant?	p value	Mean of FC	Significant?	p value
CTH	2.898	Yes	2e-09	0.9892	No	0.934173
CBS	1.736	Yes	0.007701	0.8197	No	0.269197
Statistical analysis, Fig 1F
	TwKOastro vs Ctr, preterminal
	Mean of FC	Significant?	p value
p-s6	0.3418	Yes	6.7e-05
s6	0.6342	Yes	0.005398
p-s6/s6	0.5533	Yes	0.001873
Statistical analysis, Fig S1A
	TwKOastro vs Ctr, preterminal		TwKOneuro vs Ctr, preterminal
	Significant?	p value	Significant?	p value
Body weight	Yes	5e-06	No	0.368
Statistical analysis, Fig S1B
	TwKOastro vs Ctr, preterminal			TwKOneuro vs Ctr, preterminal			TwKOneuro vs Ctr, young
	Mean of FC	Significant?	p value	Mean of FC	Significant?	p value	Mean of FC	Significant?	p value
mtDNA	0.9738	No	0.9112	0.3922	Yes	0.0127	0.5208	Yes	0.0241
Statistical analysis, Fig S1C
	TwKOneuro vs Ctr, young
	Mean of FC	Significant?	p value
ATF3	1.048	No	0.854965
ATF4	0.7136	No	0.216225
ATF5	0.8587	No	0.516118
PHGDH	0.8408	No	0.760703
PSAT1	0.8118	No	0.359108
MTHFD2	0.669	No	0.393307
Statistical analysis for Fig2 and Fig S2. Statistical analysis of metabolomics can be found in Supplemental Data 2.
Statistical analysis, Fig 2C
s6				p-s6
Two-way ANOVA				Two-way ANOVA
	P value	Significant?			P value	Significant?
Interaction	0.6904	No		Interaction	0.9971	No
Treatment	0.9123	No		Treatment	0.0002	Yes
Genotype	0.5222	No		Genotype	0.7008	No
Tukey's multiple comparisons test				Tukey's multiple comparisons test
		Adjusted P Value	Significant?			Adjusted P Value	Significant?
Veh:Ctr vs. Veh:TwKOastro		0.8649	No	Veh:Ctr vs. Veh:TwKOastro		0.9917	No
Veh:Ctr vs. Rapa:Ctr		0.9836	No	Veh:Ctr vs. Rapa:Ctr		0.0186	Yes
Veh:Ctr vs. Rapa:TwKOastro		0.9501	No	Veh:Ctr vs. Rapa:TwKOastro		0.0113	Yes
Veh:TwKOastro vs. Rapa:Ctr		0.978	No	Veh:TwKOastro vs. Rapa:Ctr		0.0221	Yes
Veh:TwKOastro vs. Rapa:TwKOastro		0.9963	No	Veh:TwKOastro vs. Rapa:TwKOastro		0.0131	Yes
Rapa:Ctr vs. Rapa:TwKOastro		0.9981	No	Rapa:Ctr vs. Rapa:TwKOastro		0.9925	No
Statistical analysis, Fig 2D
GFAP				Vimentin
Two-way ANOVA				Two-way ANOVA
	P value	Significant?			P value	Significant?
Interaction	0.9926	No		Interaction	0.1447	No
Treatment	0.9287	No		Treatment	0.1371	No
Genotype	0.0032	Yes		Genotype	0.5184	No
Tukey's multiple comparisons test				Tukey's multiple comparisons test
		Adjusted P Value	Significant?			Adjusted P Value	Significant?
Veh:Ctr vs. Veh:TwKOastro		0.1183	No	Veh:Ctr vs. Veh:TwKOastro		0.9311	No
Veh:Ctr vs. Rapa:Ctr		0.9999	No	Veh:Ctr vs. Rapa:Ctr		>0.9999	No
Veh:Ctr vs. Rapa:TwKOastro		0.1528	No	Veh:Ctr vs. Rapa:TwKOastro		0.4249	No
Veh:TwKOastro vs. Rapa:Ctr		0.1027	No	Veh:TwKOastro vs. Rapa:Ctr		0.9242	No
Veh:TwKOastro vs. Rapa:TwKOastro		>0.9999	No	Veh:TwKOastro vs. Rapa:TwKOastro		0.1862	No
Rapa:Ctr vs. Rapa:TwKOastro		0.1342	No	Rapa:Ctr vs. Rapa:TwKOastro		0.437	No
Statistical analysis, Fig S2A
ATF3				ATF4				ATF5
Two-way ANOVA				Two-way ANOVA				Two-way ANOVA
	P value	Significant?			P value	Significant?			P value	Significant?
Interaction	0.2306	No		Interaction	0.219	No		Interaction	0.08436	No
Treatment	0.475024	No		Treatment	0.0141	Yes		Treatment	0.639593	No
Genotype	0.50158	No		Genotype	0.6861	No		Genotype	0.156935	No
Tukey's multiple comparisons test				Tukey's multiple comparisons test				Tukey's multiple comparisons test
		Adjusted P Value	Significant?			Adjusted P Value	Significant?			Adjusted P Value	Significant?
Veh:Ctr vs. Veh:TwKOastro		0.979068	No	Veh:Ctr vs. Veh:TwKOastro		0.9275	No	Veh:Ctr vs. Veh:TwKOastro		0.99491	No
Veh:Ctr vs. Rapa:Ctr		0.507832	No	Veh:Ctr vs. Rapa:Ctr		0.044	Yes	Veh:Ctr vs. Rapa:Ctr		0.379244	No
Veh:Ctr vs. Rapa:TwKOastro		0.99999	No	Veh:Ctr vs. Rapa:TwKOastro		0.4283	No	Veh:Ctr vs. Rapa:TwKOastro		0.902673	No
Veh:TwKOastro vs. Rapa:Ctr		0.744157	No	Veh:TwKOastro vs. Rapa:Ctr		0.1537	No	Veh:TwKOastro vs. Rapa:Ctr		0.517063	No
Veh:TwKOastro vs. Rapa:TwKOastro		0.985078	No	Veh:TwKOastro vs. Rapa:TwKOastro		0.7785	No	Veh:TwKOastro vs. Rapa:TwKOastro		0.796257	No
Rapa:Ctr vs. Rapa:TwKOastro		0.55482	No	Rapa:Ctr vs. Rapa:TwKOastro		0.6571	No	Rapa:Ctr vs. Rapa:TwKOastro		0.133438	No
PHGDH				PSAT1				MTHFD2
Two-way ANOVA				Two-way ANOVA				Two-way ANOVA
	P value	Significant?			P value	Significant?			P value	Significant?
Interaction	0.1385	No		Interaction	0.0429	Yes		Interaction	0.0634	No
Treatment	0.6827	No		Treatment	0.1319	No		Treatment	0.8363	No
Genotype	0.3872	No		Genotype	0.4931	No		Genotype	0.378	No
Tukey's multiple comparisons test				Tukey's multiple comparisons test				Tukey's multiple comparisons test
		Adjusted P Value	Significant?			Adjusted P Value	Significant?			Adjusted P Value	Significant?
Veh:Ctr vs. Veh:TwKOastro		0.328	No	Veh:Ctr vs. Veh:TwKOastro		0.7342	No	Veh:Ctr vs. Veh:TwKOastro		0.8766	No
Veh:Ctr vs. Rapa:Ctr		0.8533	No	Veh:Ctr vs. Rapa:Ctr		0.9761	No	Veh:Ctr vs. Rapa:Ctr		0.4268	No
Veh:Ctr vs. Rapa:TwKOastro		0.988	No	Veh:Ctr vs. Rapa:TwKOastro		0.4157	No	Veh:Ctr vs. Rapa:TwKOastro		0.9633	No
Veh:TwKOastro vs. Rapa:Ctr		0.7892	No	Veh:TwKOastro vs. Rapa:Ctr		0.9254	No	Veh:TwKOastro vs. Rapa:Ctr		0.856	No
Veh:TwKOastro vs. Rapa:TwKOastro		0.5412	No	Veh:TwKOastro vs. Rapa:TwKOastro		0.0734	No	Veh:TwKOastro vs. Rapa:TwKOastro		0.6316	No
Rapa:Ctr vs. Rapa:TwKOastro		0.969	No	Rapa:Ctr vs. Rapa:TwKOastro		0.2279	No	Rapa:Ctr vs. Rapa:TwKOastro		0.2245	No
Statistical analysis, Fig S2B
CTH				CBS
Two-way ANOVA				Two-way ANOVA
	P value	Significant?			P value	Significant?
Interaction	0.5121	No		Interaction	0.1631	No
Treatment	0.3568	No		Treatment	0.2845	No
Genotype	0.1504	No		Genotype	0.0993	No
Tukey's multiple comparisons test				Tukey's multiple comparisons test
		Adjusted P Value	Significant?			Adjusted P Value	Significant?
Veh:Ctr vs. Veh:TwKOastro		0.9236	No	Veh:Ctr vs. Veh:TwKOastro		0.134	No
Veh:Ctr vs. Rapa:Ctr		0.9973	No	Veh:Ctr vs. Rapa:Ctr		0.9943	No
Veh:Ctr vs. Rapa:TwKOastro		0.3567	No	Veh:Ctr vs. Rapa:TwKOastro		0.9677	No
Veh:TwKOastro vs. Rapa:Ctr		0.9747	No	Veh:TwKOastro vs. Rapa:Ctr		0.2039	No
Veh:TwKOastro vs. Rapa:TwKOastro		0.647	No	Veh:TwKOastro vs. Rapa:TwKOastro		0.281	No
Rapa:Ctr vs. Rapa:TwKOastro		0.4553	No	Rapa:Ctr vs. Rapa:TwKOastro		0.9968	No
Statistical analysis for Fig3 and Fig S3. Statistical analysis of metabolomics can be found in Supplemental Data 2.
Statistical analysis, Fig 3D
GFAP				Vimentin
Two-way ANOVA				Two-way ANOVA
	P value	Significant?			P value	Significant?
Interaction	0.082491	No		Interaction	0.052523	No
Treatment	0.248918	No		Treatment	0.210936	No
Genotype	6e-05	Yes		Genotype	0.023224	Yes
Tukey's multiple comparisons test				Tukey's multiple comparisons test
		Adjusted P Value	Significant?			Adjusted P Value	Significant?
Chow:Ctr vs. Chow:TwKOastro		0.1963	No	Chow:Ctr vs. Chow:TwKOastro		0.993476	No
Chow:Ctr vs. Keto:Ctr		0.972	No	Chow:Ctr vs. Keto:Ctr		0.953779	No
Chow:Ctr vs. Keto:TwKOastro		0.0017	Yes	Chow:Ctr vs. Keto:TwKOastro		0.072352	No
Chow:TwKOastro vs. Keto:Ctr		0.0716	No	Chow:TwKOastro vs. Keto:Ctr		0.849392	No
Chow:TwKOastro vs. Keto:TwKOastro		0.1645	No	Chow:TwKOastro vs. Keto:TwKOastro		0.104928	No
Keto:Ctr vs. Keto:TwKOastro		0.000362	Yes	Keto:Ctr vs. Keto:TwKOastro		0.017684	Yes
Statistical analysis, Fig 3E
CTH				CBS
Two-way ANOVA				Two-way ANOVA
	P value	Significant?			P value	Significant?
Interaction	0.002387	Yes		Interaction	0.0395	Yes
Treatment	0.022499	Yes		Treatment	0.1224	No
Genotype	1.7e-05	Yes		Genotype	0.0006	Yes
Tukey's multiple comparisons test				Tukey's multiple comparisons test
		Adjusted P Value	Significant?			Adjusted P Value	Significant?
Chow:Ctr vs. Chow:TwKOastro		0.33956	No	Chow:Ctr vs. Chow:TwKOastro		0.5084	No
Chow:Ctr vs. Keto:Ctr		0.870376	No	Chow:Ctr vs. Keto:Ctr		0.9722	No
Chow:Ctr vs. Keto:TwKOastro		8.8e-05	Yes	Chow:Ctr vs. Keto:TwKOastro		0.0037	Yes
Chow:TwKOastro vs. Keto:Ctr		0.098884	No	Chow:TwKOastro vs. Keto:Ctr		0.2889	No
Chow:TwKOastro vs. Keto:TwKOastro		0.002603	Yes	Chow:TwKOastro vs. Keto:TwKOastro		0.0632	No
Keto:Ctr vs. Keto:TwKOastro		2.2e-05	Yes	Keto:Ctr vs. Keto:TwKOastro		0.0016	Yes
Statistical analysis, Fig S3A
ATF3				ATF4				ATF5
Two-way ANOVA				Two-way ANOVA				Two-way ANOVA
	P value	Significant?			P value	Significant?			P value	Significant?
Interaction	0.2781	No		Interaction	0.395116	No		Interaction	0.1537	No
Treatment	0.4948	No		Treatment	0.885057	No		Treatment	0.3955	No
Genotype	0.001	Yes		Genotype	0.395116	No		Genotype	0.0008	Yes
Tukey's multiple comparisons test				Tukey's multiple comparisons test				Tukey's multiple comparisons test
		Adjusted P Value	Significant?			Adjusted P Value	Significant?			Adjusted P Value	Significant?
Chow:Ctr vs. Chow:TwKOastro		0.2922	No	Chow:Ctr vs. Chow:TwKOastro		>0.99999999	No	Chow:Ctr vs. Chow:TwKOastro		0.3972	No
Chow:Ctr vs. Keto:Ctr		0.9915	No	Chow:Ctr vs. Keto:Ctr		0.89037	No	Chow:Ctr vs. Keto:Ctr		0.9745	No
Chow:Ctr vs. Keto:TwKOastro		0.0242	Yes	Chow:Ctr vs. Keto:TwKOastro		0.956403	No	Chow:Ctr vs. Keto:TwKOastro		0.0166	Yes
Chow:TwKOastro vs. Keto:Ctr		0.1578	No	Chow:TwKOastro vs. Keto:Ctr		0.89037	No	Chow:TwKOastro vs. Keto:Ctr		0.1826	No
Chow:TwKOastro vs. Keto:TwKOastro		0.5741	No	Chow:TwKOastro vs. Keto:TwKOastro		0.956403	No	Chow:TwKOastro vs. Keto:TwKOastro		0.3545	No
Keto:Ctr vs. Keto:TwKOastro		0.0091	Yes	Keto:Ctr vs. Keto:TwKOastro		0.592073	No	Keto:Ctr vs. Keto:TwKOastro		0.0043	Yes
PHGDH				PSAT1				MTHFD2
Two-way ANOVA				Two-way ANOVA				Two-way ANOVA
	P value	Significant?			P value	Significant?			P value	Significant?
Interaction	0.9877	No		Interaction	0.6955	No		Interaction	0.2259	No
Treatment	0.5675	No		Treatment	0.9288	No		Treatment	0.9512	No
Genotype	0.2543	No		Genotype	0.2272	No		Genotype	0.0517	No
Tukey's multiple comparisons test				Tukey's multiple comparisons test				Tukey's multiple comparisons test
		Adjusted P Value	Significant?			Adjusted P Value	Significant?			Adjusted P Value	Significant?
Chow:Ctr vs. Chow:TwKOastro		0.8543	No	Chow:Ctr vs. Chow:TwKOastro		0.936	No	Chow:Ctr vs. Chow:TwKOastro		0.9448	No
Chow:Ctr vs. Keto:Ctr		0.9792	No	Chow:Ctr vs. Keto:Ctr		0.9965	No	Chow:Ctr vs. Keto:Ctr		0.8025	No
Chow:Ctr vs. Keto:TwKOastro		0.6246	No	Chow:Ctr vs. Keto:TwKOastro		0.7935	No	Chow:Ctr vs. Keto:TwKOastro		0.5269	No
Chow:TwKOastro vs. Keto:Ctr		0.9743	No	Chow:TwKOastro vs. Keto:Ctr		0.8424	No	Chow:TwKOastro vs. Keto:Ctr		0.446	No
Chow:TwKOastro vs. Keto:TwKOastro		0.9732	No	Chow:TwKOastro vs. Keto:TwKOastro		0.985	No	Chow:TwKOastro vs. Keto:TwKOastro		0.8314	No
Keto:Ctr vs. Keto:TwKOastro		0.8304	No	Keto:Ctr vs. Keto:TwKOastro		0.648	No	Keto:Ctr vs. Keto:TwKOastro		0.1102	No
Statistical analysis, Fig S3B
	TwKOastro Chow vs TwKOastro Keto preterminal
	Mean of FC	Significant?	p value
GDF15	2.982	No	0.054
